# Supplementary material for: Non-Invasive Prenatal Diagnosis of Retinoblastoma Inheritance by Combined Targeted Sequencing Strategies
Source: PubMed Central journal article supplement (PMC7692133; doi:10.3390/jcm9113517), 2020-10-30
Supplement: jcm-09-03517-s001.pdf [file jcm-09-03517-s001.pdf]

## Supplementary Materials

**Table S1.** Primer sequences for amplicon based NIPD for Rb.

| <i>RB1</i><br>Mutation | Forward Primer                 | Reverse Primer                   | Family<br>Tested |
|------------------------|--------------------------------|----------------------------------|------------------|
| c.1735C>T              | CATGTTTCATATAGGATTCACCTTTATTTG | AAGGTGATCAGTTGGTCCTTC            | A                |
| c.1498+1G>C            | TGAGGTTGTAATGGCCACATATAG       | ACCAAAGAAACACACCACATTT           | B                |
| c.1072C>T <sup>1</sup> | TTTGAAACACAGAGAACACCA          | CTGGAGTGTGTGGAGGAATTA            | C, J             |
| c.1075A>T <sup>1</sup> |                                |                                  | D                |
| c.1238A>T              | AGAACTGCACAGTGAATCCAA          | CCACAGCTTTAGCAAATTTCTCTT         | E                |
| c.1039dupT             | CTTTCTAAACGATACGAAGA           | TGTGCAATACCTGTCTAT               | F                |
| c.1199dupT             | TCAGCAAGTGATCAACCTTCA          | CTTTGCCAAGATATTACAATAAATAATGTTTC | G                |
| c.1333C>T              | GATTTTCTAAAATAGCAGGCTCTTATTT   | TACAAACTTGGAGTTCGCTTG            | H, I             |
| c.958C>T               | TTCTTTCAAGGTTGAAAATCTTTCTAAA   | TCCAAAAATAATCTTGCATCTAGATCT      | K                |
| c.1630delA             | CAAAGCAGAAGGCAACTTGA           | GGGATTCCATGATTCGATGTTTC          | NA               |

<sup>1</sup> One primer pair used for both mutations

**Table S2.** Primer sequences for amplicon based fetal load quantification.

| SNP ID     | Location (hg19)          | Forward Primer              | Reverse Primer              |
|------------|--------------------------|-----------------------------|-----------------------------|
| rs6968649  | chr7: 16596685           | TGGAGCAGAAGTAGAAGA          | CTTGCTAGGCTTTCCAAA          |
| rs131      | chr7: 24938887           | GTCTGGACAGAGCAGAAG          | AATCCAGCAGTATTAACAGT        |
| rs41342    | chr7: 28709185           | GTGGAGGGCATAACAGGAA         | GAAATAACTTCGGATTTTCAGAA     |
| rs30560    | chr7: 32062091           | GGTAGATTTTCAGACAAGTG        | CATCACCCCATGATTTTC          |
| rs38308    | chr7: 70068401           | GGACAGAGCCACACCTTT          | GCATGTTCTAGACTGAAGCA        |
| rs43005    | chr7: 90763178           | TACCAGATTCTCCTCTGTAGATC     | ATGCCCTGTGGTTGTAAA          |
| rs41264    | chr7: 105616335          | TGAGTCAGGGTGTCTTCC          | CAAAGCTCTCCTAGTGACTAATG     |
| rs193588   | chr7: 116850770          | TGAACCAAGCCTTGAAGAAGTAG     | GCCCCACCACCTTACCATTCT       |
| rs16806    | chr8: 2963372            | AATGGCTAGAAAGATAACAGATAG    | GCTTCCGCTATGAAAACCTT        |
| rs10091913 | chr8: 10853377           | AATGTGAGAGGGCAATCC          | GTCTGATTCAACTACAGGTG        |
| rs354511   | chr8: 15534444           | AAACTGAAATAGCTAGAGC         | GACTTTCAATATATACAACCATC     |
| rs97635    | chr8: 15608681           | AGTTTGGGTGTCTCTGTT          | CCATTACCTAAAATACCCTGATTG    |
| rs967317   | chr8: 59972309           | TTATTCCTACTTGATTTCCCTTAT    | TGAAACAATGCCACAAAGC         |
| rs13279476 | chr8: 73821487           | CACATTGGTGTAGCTCAT          | CTCATTGGGTTGACATCT          |
| rs16884    | chr8: 97875315           | ACTACCTTGTGAAGCCTCT         | TGAATTGGTTAGAATCAGATTGTAAGA |
| rs2705274  | chr8: 138959247          | TCAGAAAGTGTTTTGGAGTAAAAGTA  | ACAATCCACAGGGGAAAAGA        |
| rs1926394  | chr9: 7315722            | GGAGAGGGTGAGTGTTC           | AATTATAGATTAGCTTCAAGATGGC   |
| rs1339143  | chr9: 23218974           | GGAAACAATCGTGGAAG           | GTTTCTTGACTCTATCAG          |
| rs2938882  | chr9: 81187857           | TTGCCATTGTCTTCAACC          | CTTTGGTTAAGGATTTCTGAC       |
| rs1929709  | chr9: 83752537           | TTATAAGACTCATGTTGACTGTATAG  | GAGCCATTGGCCCTTTTC          |
| rs191623   | chr9: 89098238           | TGAAATGAGCATGGCATAGTATT     | TGCATGGCACCCAGAATC          |
| rs2025151  | chr9: 99161512           | CTTTCGGCTCAGCACAAG          | GGACACTGTGGTGTCTTAG         |
| rs182705   | chr9: 102085812          | CCAACAGGAAGCAATAGA          | AGCCCAACTTATAGAATTTT        |
| rs1809924  | chr9: 107814469          | GTGGGGCTAGGATGATTAGAAT      | TGTGGGTCCTGTGCATTA          |
| rs2797820  | chr9: 136557606          | GCAGGTCACACTGGTTCT          | GAAGGATGGGGAGGAGCC          |
| rs7489602  | chr13: 23994932          | TGATGTTTCATCAGGAGCC         | ACACTTGACTCCAAATGTCT        |
| rs2274276  | chr13: 50095953          | TTTCTATTCAATGAACCCTCTC      | GCAAAACAGGTAAATAATTGAGTA    |
| rs339528   | chr13: 60562931          | ATATCAGAAATTATCTCCCATGCC    | CACCAAATAATTAAGGCTTACCAT    |
| rs1535802  | chr13: 74318497          | CAAAATGGGGTCAATACTACCTA     | CCTTTCATCCATGCCCTC          |
| rs342718   | chr13: 92392966          | TTAAACAGCCAGCAAAGC          | GAGCGCAATGTCCTTTAC          |
| rs9585307  | chr13: 100621776         | AAGAAGGTGTGCGTGAAG          | AAGACAGGAATGCGCTTTC         |
| rs4405424  | chr13: 108330594         | TTCTTCCAATGAACTCCACA        | CCATACGCTGAGCACACA          |
| rs831150   | chr13: 111773316         | TGCCACCTATACTGAACTT         | CCGTCTCCTTTCCTGATC          |
| rs8085897  | chr18: 361365            | CTCTCTAGTCATCGTTT           | ATGAAAAGATCTCACACTA         |
| rs1784762  | chr18: 2895959           | TAAGCAGATCGCCAGACC          | TGAAGAGGGCAACAGGCT          |
| rs569589   | chr18: 3555986           | TATCTTGAAACTTCTTCTTTAGAGAG  | ATATACAATGCTCTGCGTGT        |
| rs588257   | chr18: 11992479          | AGGAGCACAAGAACAAGA          | GAGACATCCTAGGCTAACATA       |
| rs1941702  | chr18: 31236980          | AACATTAATAGATCGACTGCTCTG    | CCACAGGCTTGGAACCTC          |
| rs4245250  | chr18: 45588281          | ACTTTGAAATAGTCAGTATCACTTCTA | TGCCATTCTTATTACTGATGCT      |
| rs1790580  | chr18: 67465595          | GGTAGGAGGGCAAAGTTC          | TTCAGCGTTTGTAACTCTT         |
| rs1810181  | chr18: 77072267          | GATTGGGTGGTGCCTTCTA         | ACACAGTAATATAACTGCATTTAGGAA |
| SRY        | chrY:2655608-<br>2655670 | TTGTGCGACTCTCCTTGT          | TGAATACGCTTAACATAGCAGAAG    |
